# Supplementary material for: Usability of electronic health record systems in UK EDs
Source: HighWire-hosted journal article supplement (doi:10.1136/emermed-2020-210401), 2021-03-03
Supplement: emermed-2020-210401supp001_data_supplement.pdf [file emermed-2020-210401supp001_data_supplement.pdf]

## Usability of electronic health record systems in UK emergency departments

### Supplementary material

#### Table of Contents

|                                                                                                                              |   |
|------------------------------------------------------------------------------------------------------------------------------|---|
| SUPPLEMENTARY MATERIAL.....                                                                                                  | 1 |
| System Usability Scale .....                                                                                                 | 1 |
| Supplementary material table 1. SUS scores from EHRs with < 20 responses. ....                                               | 2 |
| Supplementary material table 2. Functionality of viewing investigation results directly from EHR, number responses (%) ..... | 3 |
| Supplementary material table 3. Functionality of viewing out-patients or primary care record, number responses (%) .....     | 4 |
| Supplementary material figure 1. Responses from organisations in UK & British Crown Dependencies. ....                       | 5 |

#### System Usability Scale

1. I like using the system
2. I find the system unnecessarily complex
3. I think the system is easy to use
4. I need the support of a technical person to use the system
5. I find the various functions in the system are well integrated
6. I think there is too much inconsistency in the system
7. I learned to use the system very quickly
8. I find the system very cumbersome to use
9. I feel very confident using the system
10. I needed to learn a lot of things before I could get going with this system

Each item is scored from 1 (strongly disagree) to 5 (strongly agree).

To calculate the SUS:

1. The score for odd-numbered items is the response minus 1, the score for even numbered items is 5 minus the response. For instance if a respondent had scored question 1 as 3, and questions 2 as 5, the scores would be 2 and 0 respectively. This is because odd numbers are positively framed, and even numbers are negatively framed.
2. Add the calculated scores together.
3. Multiply by 2.5. This gives a score that can range from 0 to 100.

| System supplier                     | No. responses | Median SUS | IQR     | No. Org. |
|-------------------------------------|---------------|------------|---------|----------|
| Hospedia/Extramed                   | 19            | 45         | 31 - 64 | 4        |
| Patient Centre                      | 18            | 30         | 17 - 41 | 4        |
| TPP/SystemOne                       | 13            | 38         | 23 - 50 | 1        |
| Cambio (Cosmic)                     | 10            | 28         | 23 - 58 | 1        |
| Harris Healthcare (QuadraMed)       | 9             | 40         | 38 - 53 | 2        |
| LastWord                            | 8             | 43         | 31 - 53 | 1        |
| GE Healthcare                       | 1             | 88         | 88 - 88 | 1        |
| TOPAS                               | 1             | 61         | 60 - 60 | 1        |
| HP Enterprise Services (Swift Plus) | 1             | 44         | 43 - 43 | 1        |
| Overall                             | 80            | 43         | 38 - 45 | 16       |

**Supplementary material table 1. SUS scores from EHRs with < 20 responses.**

| EHR Provider | All linked | Separate for blood results | Separate for x-ray | Separate for both | Not linked to either | Total responses |
|--------------|------------|----------------------------|--------------------|-------------------|----------------------|-----------------|
| EMIS         | 34 (9)     | 7 (2)                      | 124 (35)           | 140 (39)          | 53 (15)              | 358             |
| Cerner       | 150 (49)   | 4 (1)                      | 141 (46)           | 5 (2)             | 4 (1)                | 304             |
| DXC          | 26 (13)    | 6 (3)                      | 35 (18)            | 92 (47)           | 38 (19)              | 197             |
| System C     | 57 (37)    | 2 (1)                      | 67 (44)            | 19 (12)           | 9 (6)                | 154             |
| Intersystems | 24 (31)    | 9 (12)                     | 29 (37)            | 9 (12)            | 7 (9)                | 78              |
| Allscripts   | 45 (58)    | 1 (1)                      | 10 (13)            | 17 (22)           | 4 (5)                | 77              |
| Ideagen      | 6 (9)      | 2 (3)                      | 8 (12)             | 34 (51)           | 17 (25)              | 67              |
| Meditech     | 40 (83)    | 1 (2)                      | 5 (10)             | 2 (4)             | 0 (0)                | 48              |
| NerveCentre  | 9 (20)     | 9 (20)                     | 0 (0)              | 17 (37)           | 11 (24)              | 46              |
| Epic         | 32 (100)   | 0 (0)                      | 0 (0)              | 0 (0)             | 0 (0)                | 32              |
| Servelec     | 1 (3)      | 1 (3)                      | 10 (32)            | 16 (52)           | 3 (10)               | 31              |
| IMS Maxims   | 19 (63)    | 4 (13)                     | 2 (7)              | 5 (17)            | 0 (0)                | 30              |
| Silverlink   | 1 (3)      | 0 (0)                      | 1 (3)              | 14 (48)           | 13 (45)              | 29              |
| Atos         | 1 (4)      | 1 (4)                      | 11 (41)            | 4 (15)            | 10 (37)              | 27              |
| Welsh PAS    | 7 (33)     | 0 (0)                      | 3 (14)             | 7 (33)            | 4 (19)               | 21              |
| Total        | 470 (31)   | 47 (3)                     | 447 (29)           | 381 (25)          | 174 (11)             | 1499            |

**Supplementary material table 2. Functionality of viewing investigation results directly from EHR, number responses (%)**

Responses are to the question: *If you are looking at a patient's ED record and want to see blood results or look at an X-ray, can you do that without having to log into a separate system?*

| EHR Provider | All linked | Separate for out-patients | Separate for GP | Separate for both | Not linked to either | Total responses |
|--------------|------------|---------------------------|-----------------|-------------------|----------------------|-----------------|
| EMIS         | 21 (6)     | 29 (8)                    | 30 (8)          | 162 (45)          | 117 (33)             | 359             |
| Cerner       | 144 (47)   | 17 (6)                    | 114 (38)        | 18 (6)            | 11 (4)               | 304             |
| DXC          | 29 (15)    | 4 (2)                     | 36 (18)         | 63 (32)           | 65 (33)              | 197             |
| System C     | 31 (20)    | 7 (5)                     | 49 (32)         | 41 (27)           | 26 (17)              | 154             |
| Intersystems | 12 (15)    | 12 (15)                   | 21 (27)         | 19 (24)           | 14 (18)              | 78              |
| Allscripts   | 27 (35)    | 5 (6)                     | 17 (22)         | 14 (18)           | 14 (18)              | 77              |
| Ideagen      | 3 (4)      | 7 (10)                    | 8 (12)          | 29 (43)           | 20 (30)              | 67              |
| Meditech     | 20 (41)    | 4 (8)                     | 15 (31)         | 7 (14)            | 3 (6)                | 49              |
| NerveCentre  | 1 (2)      | 3 (7)                     | 7 (15)          | 19 (41)           | 16 (35)              | 46              |
| Epic         | 10 (31)    | 0 (0)                     | 21 (66)         | 0 (0)             | 1 (3)                | 32              |
| IMS Maxims   | 2 (6)      | 1 (3)                     | 2 (6)           | 14 (45)           | 12 (39)              | 31              |
| Servelec     | 1 (3)      | 1 (3)                     | 5 (16)          | 17 (55)           | 7 (23)               | 31              |
| Silverlink   | 2 (7)      | 0 (0)                     | 3 (10)          | 10 (34)           | 14 (48)              | 29              |
| Atos         | 2 (7)      | 1 (4)                     | 2 (7)           | 9 (33)            | 13 (48)              | 27              |
| Welsh PAS    | 5 (24)     | 2 (10)                    | 7 (33)          | 5 (24)            | 2 (10)               | 21              |
| Total        | 316 (21)   | 93 (6)                    | 350 (23)        | 427 (28)          | 336 (22)             | 1502            |

**Supplementary material table 3. Functionality of viewing out-patients or primary care record, number responses (%)**

Responses are to the question: *If you are looking at a patient's ED record and want to see what happened in outpatients or their GP, can you do that without having to log into a separate system?*

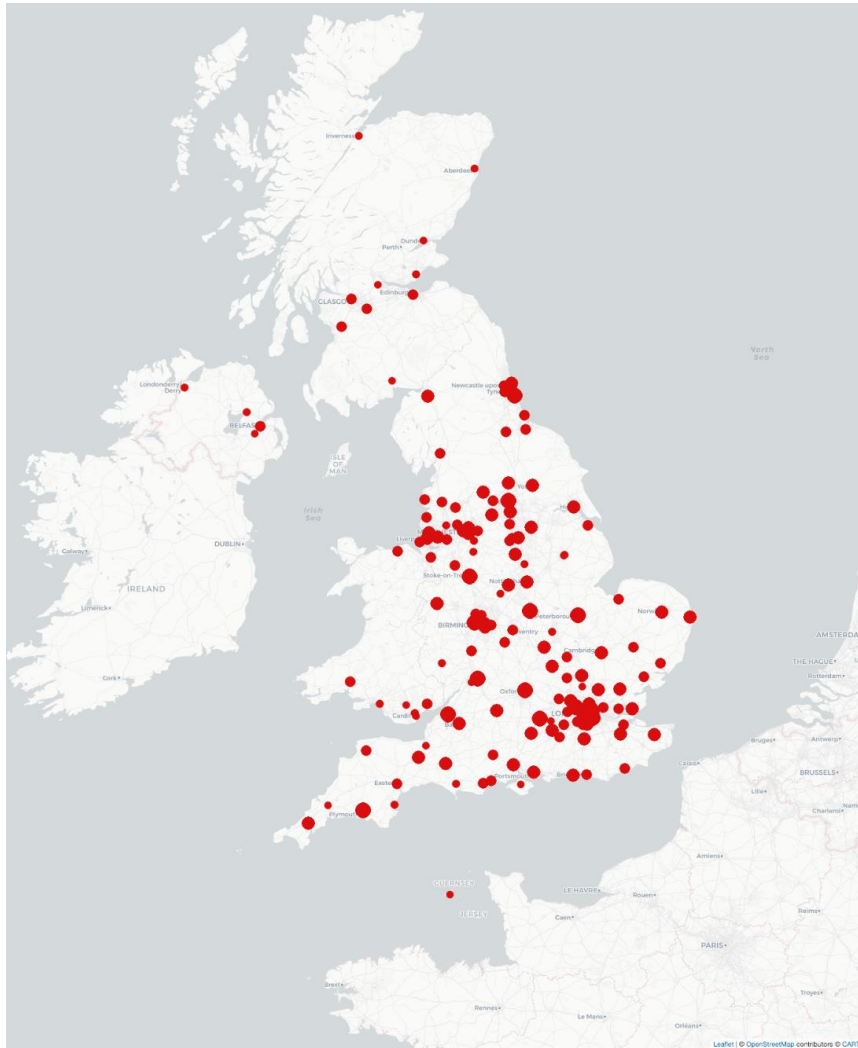

**Supplementary material figure 1. Responses from organisations in UK & British Crown Dependencies.**

Size of spot is proportional to number of responses.
